# Supplementary material for: Increased BAT Thermogenesis in Male Mouse Apolipoprotein A4 Transgenic Mice
Source: MDPI journal article supplement (doi:10.3390/ijms24044231), 2023-02-20
Supplement: s1 [file s1]

## Supplementary

### *Body Weight and Food Intake in APOA4-Tg Mice Fed an HFD for 10 Weeks and Housed at Normal Ambient Temperature*

To examine whether overexpression of APOA4 in the small intestine can regulate body weight and food intake in HFD-fed mice at normal ambient temperature, body weight and food intake in WT and APOA4-Tg mice were monitored when fed a HFD for 10 weeks at 21°C. After 10 weeks of HFD, APOA4-Tg mice have comparable body weight, body weight gain and daily food intake relative to their WT controls (Supplementary Figure S1A-C).

**A. Body weight-10 week HFD**

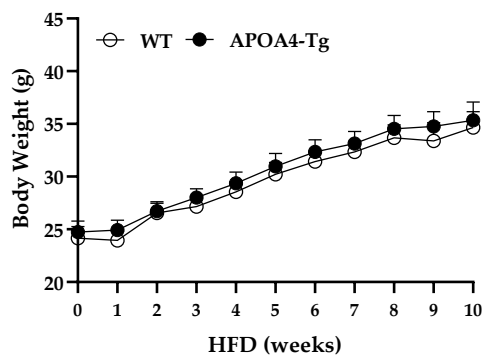

**B. Daily caloric intake-10 week HFD**

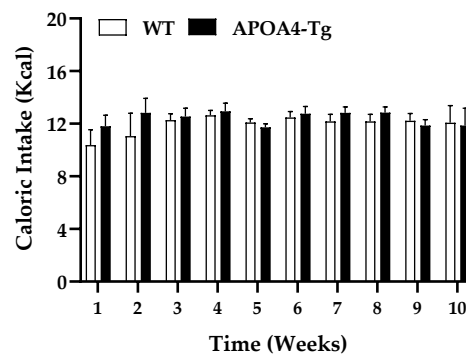

**C. Body weight gain-10 week HFD**

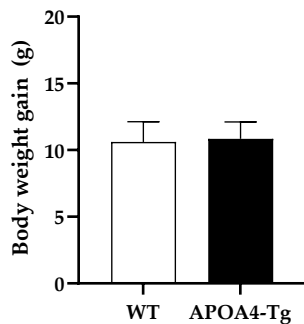

**Supplementary Figure S1.** Body weight (A) and daily caloric intake (B) in mice during a 10-week feeding of HFD at 21°C. Body weight gain (C) in mice fed an HFD for 10 weeks when mice were housed at 21°C. Data are expressed as mean  $\pm$  SEM for 5-6 animals per group.
